# Supplementary material
Source: Springer Nature journal article supplement (https://www.springermedizin.de/resource/supplementary/12950_2009_158_MOESM2_ESM.pdf/9558084)

◆ Mean  
▨ 5%-95% C.I.  
┆ 1%-99% C.I.

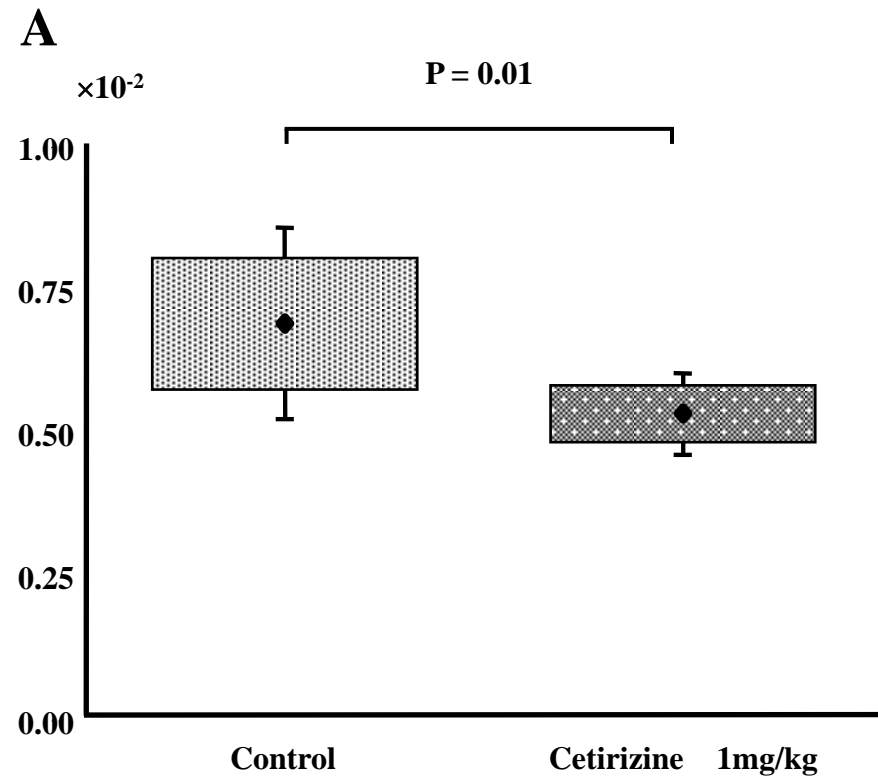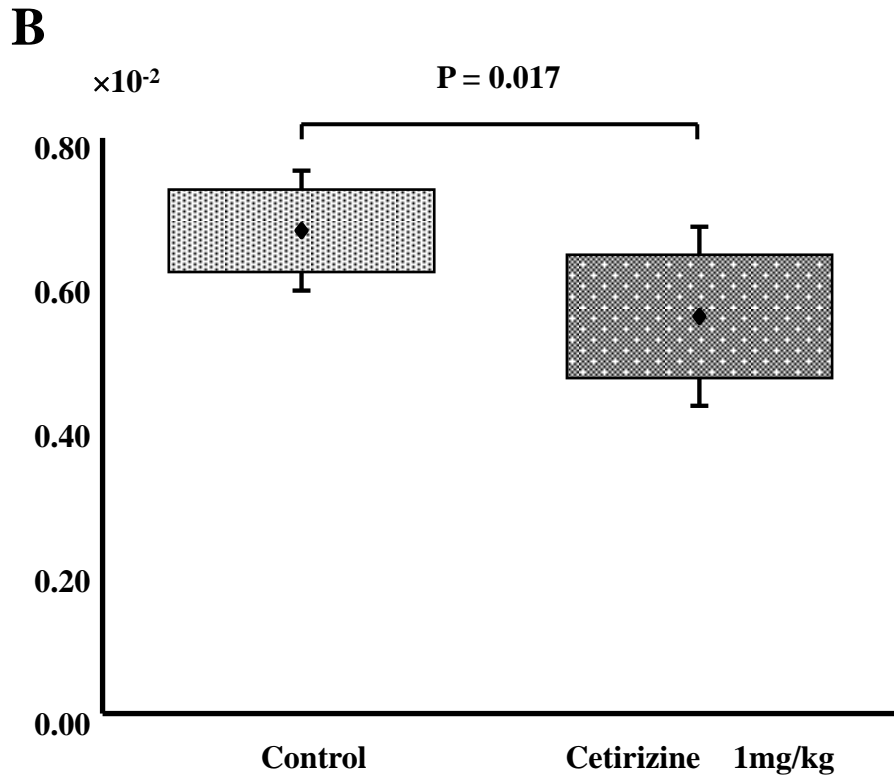

Supplement: MOESM2 [file 9558084]
